# Supplementary material for: Electroconvulsive therapy-induced brain functional connectivity predicts therapeutic efficacy in patients with schizophrenia: a multivariate pattern recognition study
Source: PubMed Central journal article supplement (PMC5441568; doi:10.1038/s41537-017-0023-7), 2017-05-11

## Supplemental information

Supplementary Tables: 1

Supplementary Figures: 4

## Supplementary Tables

Table S1. Demographic and clinical characteristics for the new dataset

| Characteristic              | Schizophrenia | Healthy controls | $t/\chi^2$ | $p$  |
|-----------------------------|---------------|------------------|------------|------|
|                             | patients      |                  |            |      |
|                             | $n = 33$      | $n = 20$         |            |      |
|                             | Mean (SD)     | Mean (SD)        |            |      |
| Age (years)                 | 28.76 (8.91)  | 24.16 (6.66)     | -1.96      | 0.06 |
| Sex (male/female)           | 17/16         | 14/6             | 1.75       | 0.19 |
| Education (years)           | 12.70 (2.78)  | 11.47 (3.19)     | -1.45      | 0.15 |
| Age of onset (years)        | 26.44 (9.13)  | NA               |            |      |
| Duration of illness (years) | 2.61 (2.05)   | NA               |            |      |
| PANSS score                 |               |                  |            |      |
| Total                       | 76.78 (6.23)  | NA               |            |      |
| Positive                    | 25.63 (2.75)  | NA               |            |      |
| Negative                    | 15.93 (2.95)  | NA               |            |      |
| General                     | 35.30 (3.92)  | NA               |            |      |

## Supplementary Figures

Fig S1: Associations between changes in SVM scores and symptom improvement as measured by PANSS scores without outliers in ECT group. SVM: support vector machine; PANSS: Positive and Negative Syndrome Scale; ECT: electroconvulsive therapy.

Figure S1

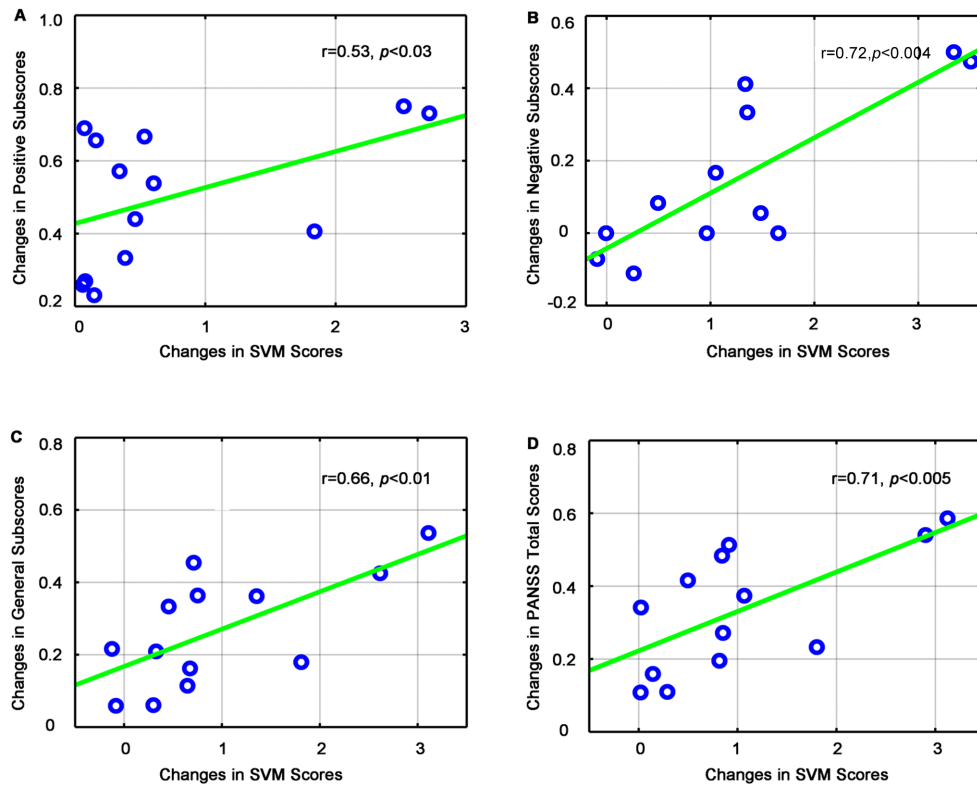

Fig S2: Scatterplots of baseline SVM scores that negatively correlated with the symptom improvement as measured by PANSS scores without outliers in ECT group. SVM: support vector machine; PANSS: Positive and Negative Syndrome Scale; ECT: electroconvulsive therapy.

Figure S2

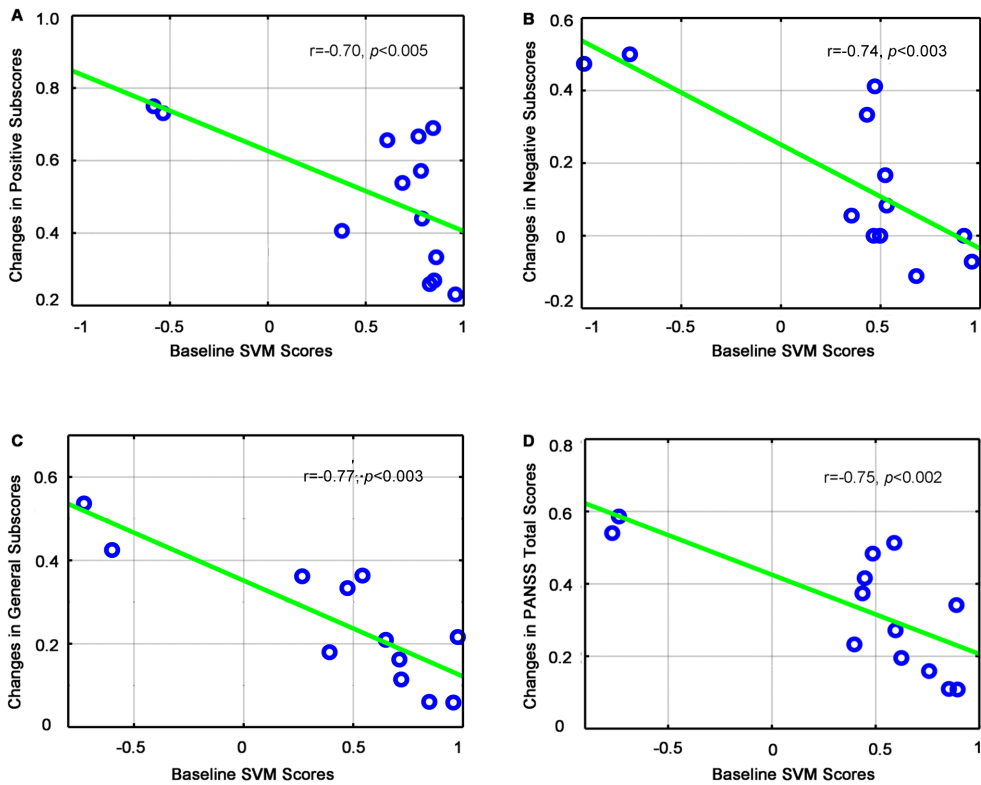

Fig S3: Associations between baseline SVM scores and improvement of clinical symptoms based on the Positive and Negative Syndrome Scale total scores ( $r=0.49$ ,  $p<0.03$ ) in MED-only group. SVM: support vector machine.

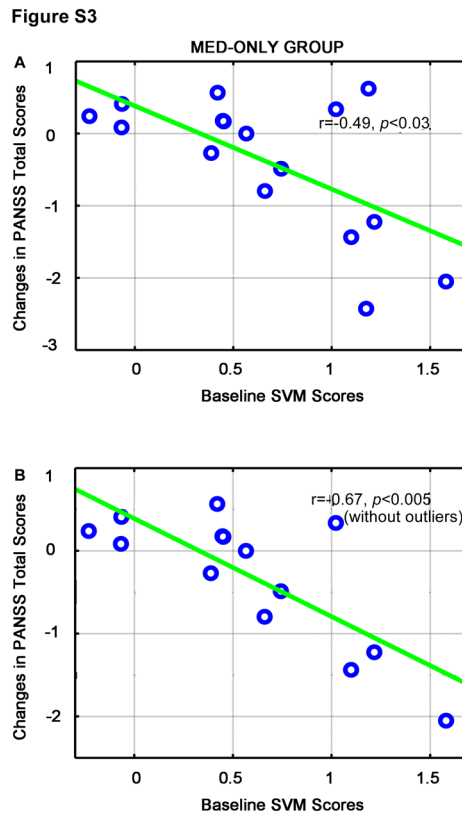

Figure S4. Twenty average independent components (ICs) obtained using GIG-ICA. The sagittal, coronal, and axial views of the 20 mean ICs are displayed in radiological convention (left is right). The z map of each IC was obtained with threshold of  $p < 0.01$  (FWE corrected) and cluster size  $\geq 50$ . GIG-ICA: group information-guided independent-component analysis; FWE: family-wise error.

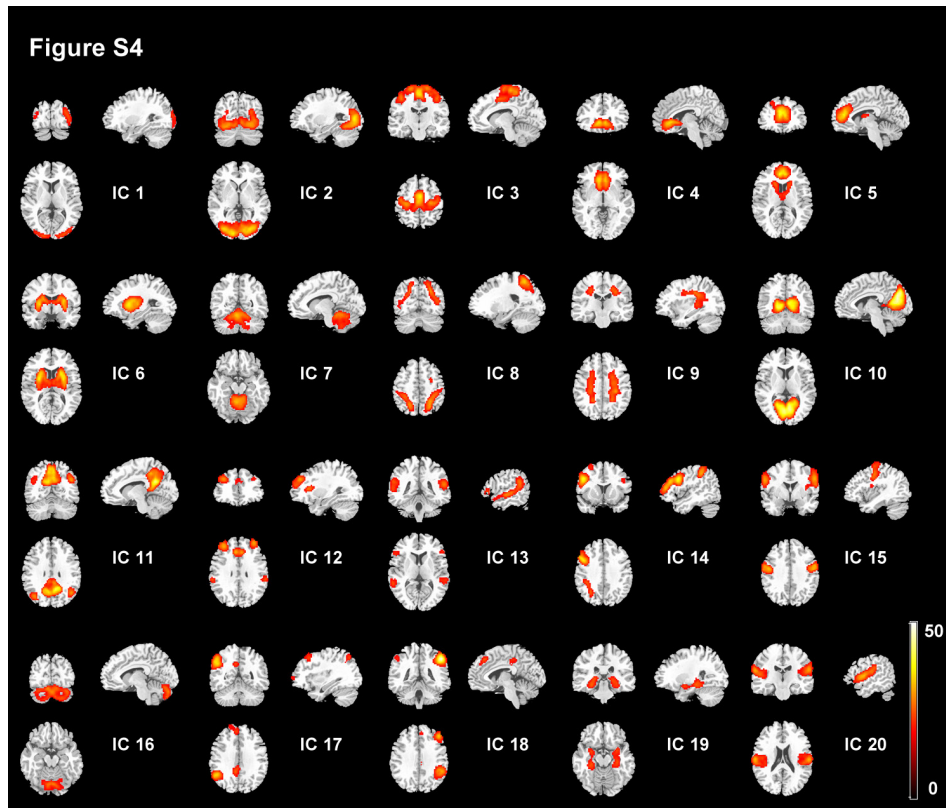

Supplement: 41537_2017_23_MOESM1_ESM.pdf [file 41537_2017_23_MOESM1_ESM.pdf]
